# Supplementary material for: The toxic effects of alizarin red S on catalase at the molecular level
Source: Royal Society of Chemistry journal article supplement (doi:10.1039/c9ra02986a), 2019-01-01
Supplement: c9ra02986a1.pdf [file c9ra02986a1.pdf]

## Supplementary information

### The toxic effects of Alizarin Red S to catalase at molecular level

*Shimeng Hu<sup>a</sup>, Dong Yuan<sup>b</sup>, Yang Liu<sup>b</sup>, Lining Zhao<sup>a</sup>, Hongli Guo<sup>a</sup>, Qigui Niu<sup>a</sup>, Wansong Zong<sup>c</sup>,*

*Rutao Liu<sup>a,b\*</sup>*

<sup>a</sup> School of Environmental Science and Engineering, Shandong University, America CRC for Environment & Health, Shandong Province, 72# Jimo Binhai Road, Qingdao, Shandong 266237, P.R. China

<sup>b</sup> Department of Chemistry and Chemical Engineering, Qilu Normal University, Jinan 250013, P.R. China

<sup>c</sup> College of Population, Resources and Environment, Shandong Normal University, 88# East Wenhua Road, Jinan 250014, P.R. China

\*All correspondence should be addressed to:

Rutao Liu

School of Environmental Science and Engineering,

Shandong University, Qingdao, Shandong province, 72# Jimo Binhai Road, Qingdao, Shandong 266237, P.R. China

Phone/Fax: 86-531-88365489

Email: [rutaoliu@sdu.edu.cn](mailto:rutaoliu@sdu.edu.cn)

P.R. China

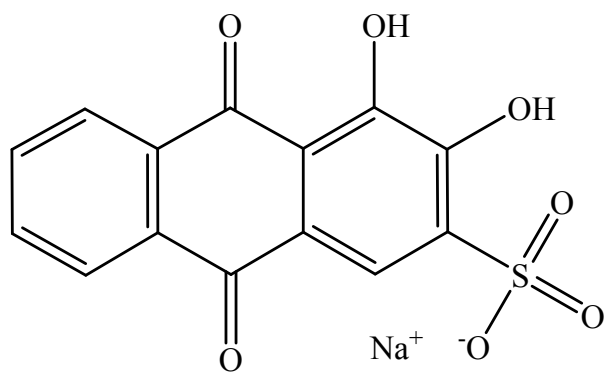

**Fig. S1** Structure of Alizarin Red S.

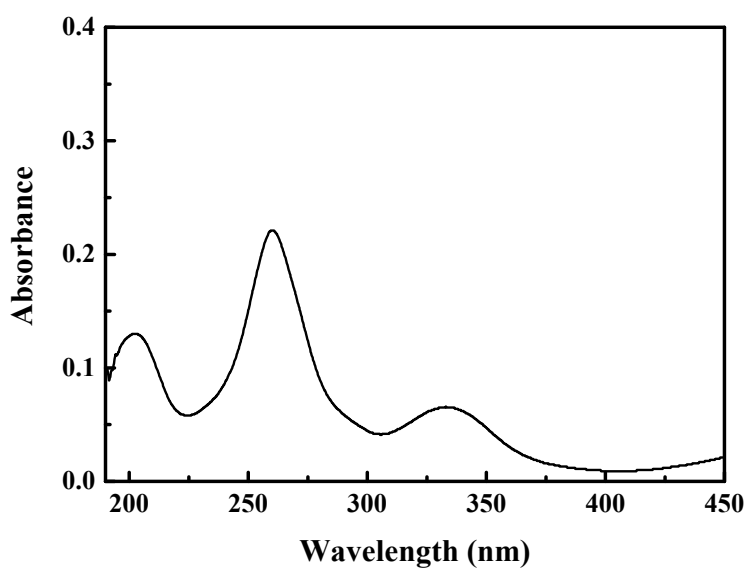

**Fig. S2** UV-Vis spectrum of Alizarin Red S.

**Conditions:** ARS: 10  $\mu$ M; pH 7.4; T = 298 K.

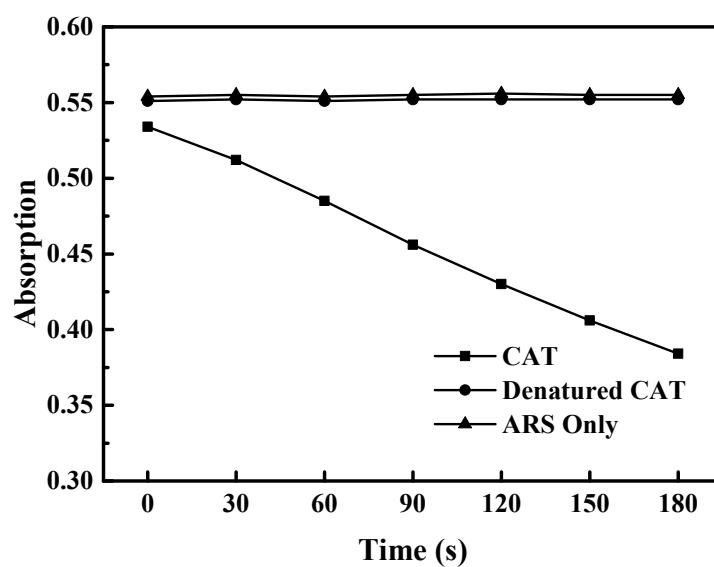

**Fig. S3** Absorption change of hydrogen peroxide along with time.

**Conditions:** CAT: 1  $\mu$ M CAT; Denatured CAT: 1  $\mu$ M CAT that was denatured by heating and ultrasonic wave; ARS Only: 10  $\mu$ M ARS; pH = 7.4; T = 298 K.

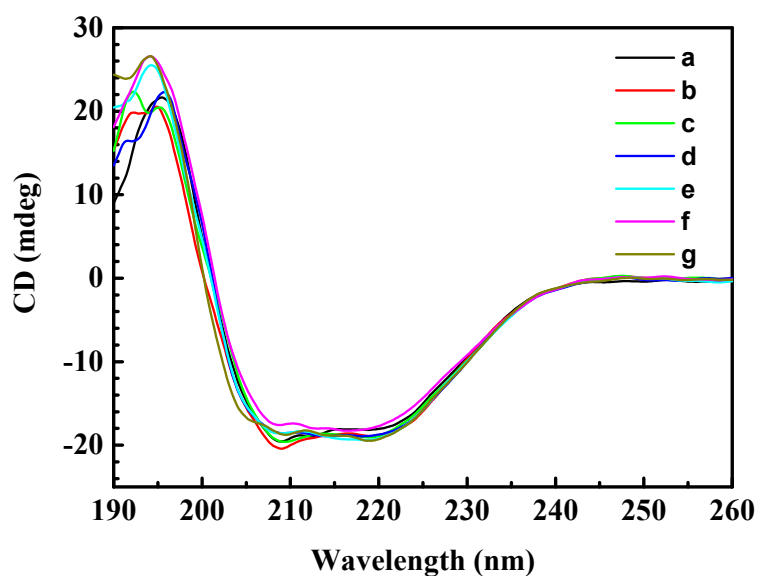

**Fig. S4** CD spectra of CAT-ARS system.

**Conditions:** CAT: 1  $\mu$ M; ARS/( $\mu$ M): a-g. 0, 2; 4, 6, 8, 10, 50; pH 7.4; T = 298 K.

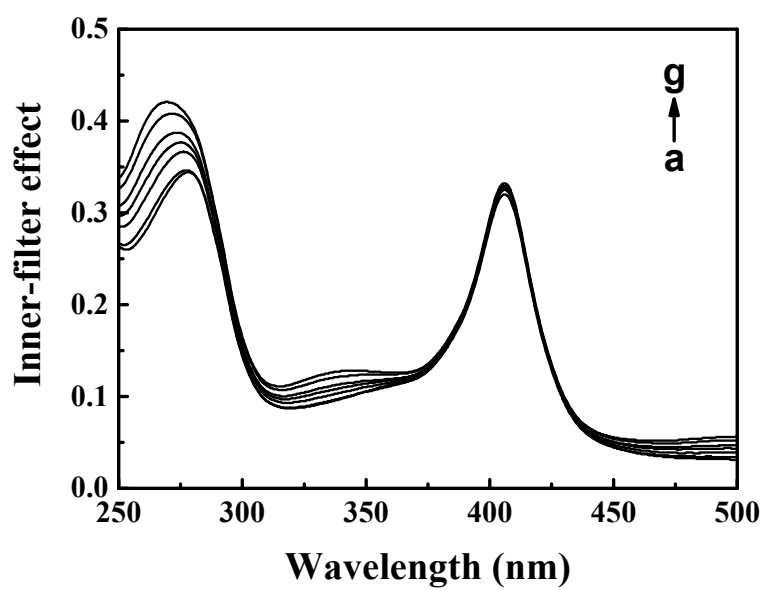

**Fig. S5** The inner-filter effect of CAT-ARS system.

**Conditions:** CAT: 1 $\mu$ M; ARS/( $\mu$ M): a-g. 0, 1, 2, 3, 4, 5, 6; pH 7.4; T = 298 K.

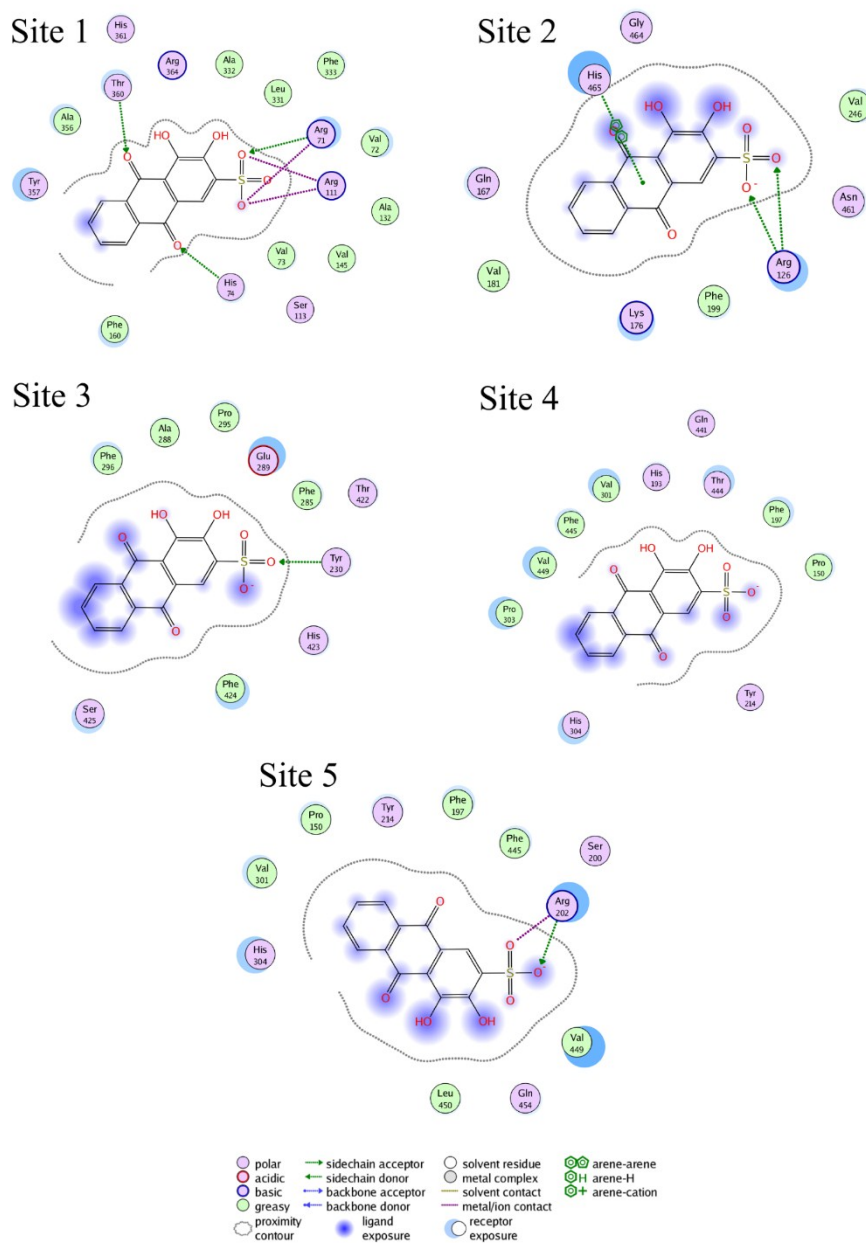

**Fig. S6** Interaction between ARS and the amino acid residues in different binding sites of CAT.

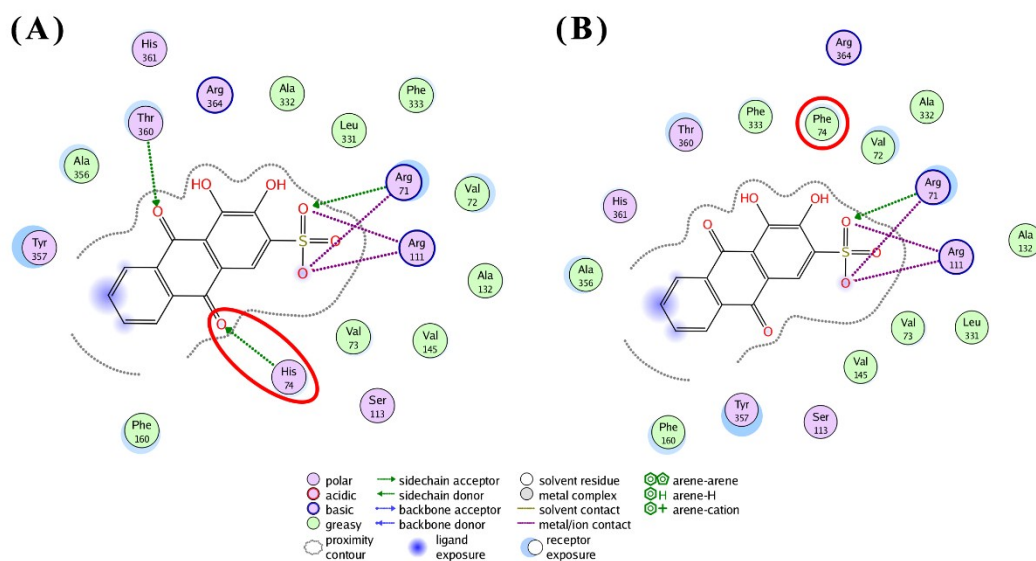

**Fig. S7** Interaction between ARS and CAT: (A) original CAT; (B) CAT where His 74 was mutated to Phe.

**Table S1** Binding parameters before and after mutating His74 at site 1.

| Ligand       | Receptor    | Interaction | Distance | E (kcal/mol) |
|--------------|-------------|-------------|----------|--------------|
| original CAT |             |             |          |              |
| O 8          | CD2 HIS 74  | H-acceptor  | 3.31     | -0.7         |
| O 11         | OG1 THR 360 | H-acceptor  | 3.42     | -0.6         |
| O 20         | NE ARG 71   | H-acceptor  | 2.83     | -3.5         |
| O 20         | NE ARG 71   | ionic       | 2.83     | -5.7         |
| O 20         | NH2 ARG 71  | ionic       | 3.67     | -1.3         |
| O 20         | NE ARG 111  | ionic       | 3.89     | -0.7         |
| O 21         | NE ARG 71   | ionic       | 3.8      | -1           |
| O 21         | NE ARG 111  | ionic       | 3.82     | -0.9         |
| mutated CAT  |             |             |          |              |
| O 26         | NE ARG 71   | H-acceptor  | 2.82     | -6           |
| O 26         | NE ARG 71   | ionic       | 2.82     | -5.8         |
| O 26         | NH2 ARG 71  | ionic       | 3.66     | -1.3         |
| O 26         | NE ARG 111  | ionic       | 3.98     | -0.6         |
| O 27         | NE ARG 71   | ionic       | 3.73     | -1.1         |
| O 27         | NE ARG 111  | ionic       | 3.84     | -0.8         |
